# Supplementary material for: How People Evaluate Anti-Corona Measures for Their Social Spheres: Attitude, Subjective Norm, and Perceived Behavioral Control
Source: PubMed Central journal article supplement (PMC7689201; doi:10.3389/fpsyg.2020.567405), 2020-11-12
Supplement: Table_1.pdf [file Table_1.pdf]

*Table S1:* Results of the partial least path square modelling with the calculated quality as dependent variable and the attitude, subjective norm and perceived behavioral control as independent variables of the inner model: R squared, goodness of fit index (GoF, geometric mean of the average communality and the R squared value), path coefficients and p-values, and variance inflation factors (VIF) and weights of the variables of the outer model (n = 663) (own representation).

| Restrictions on outdoor activities (calculated quality) |                  | R squared | GoF                      |       |        |  |
|---------------------------------------------------------|------------------|-----------|--------------------------|-------|--------|--|
|                                                         |                  | 0.928     | 0.752                    |       |        |  |
| Inner model                                             |                  |           | Outer model              |       |        |  |
| Construct                                               | Path coefficient | p-value   | Indicator                | VIF   | Weight |  |
| Attitude                                                | 0.494            | 4.37E-186 | Close family             | 2.256 | 0.294  |  |
|                                                         |                  |           | Wider family and friends | 2.748 | 0.296  |  |
|                                                         |                  |           | Colleagues at work       | 2.197 | 0.279  |  |
|                                                         |                  |           | Society in general       | 2.444 | 0.297  |  |
| Subjective norm                                         | 0.184            | 2.31E-66  | Close family             | 1.984 | 0.378  |  |
|                                                         |                  |           | Wider family and friends | 2.265 | 0.355  |  |
|                                                         |                  |           | Colleagues at work       | 1.483 | 0.303  |  |
|                                                         |                  |           | Society in general       | 1.289 | 0.229  |  |
| Perceived behavioural control                           | 0.115            | 1.54E-153 | Close family             | 1.159 | 0.369  |  |
|                                                         |                  |           | Wider family and friends | 1.373 | 0.348  |  |
|                                                         |                  |           | Colleagues at work       | 1.206 | 0.361  |  |
|                                                         |                  |           | Society in general       | 1.419 | 0.364  |  |
| Tips for hygiene (calculated quality)                   |                  | R squared | GoF                      |       |        |  |
|                                                         |                  | 0.893     | 0.761                    |       |        |  |
| Inner model                                             |                  |           | Outer model              |       |        |  |
| Construct                                               | Path coefficient | p-value   | Indicator                | VIF   | Weight |  |
| Attitude                                                | 0.514            | 6.86E-105 | Close family             | 2.535 | 0.289  |  |
|                                                         |                  |           | Wider family and friends | 3.000 | 0.295  |  |
|                                                         |                  |           | Colleagues at work       | 2.231 | 0.283  |  |
|                                                         |                  |           | Society in general       | 2.188 | 0.288  |  |
| Subjective norm                                         | 0.228            | 2.12E-29  | Close family             | 2.390 | 0.334  |  |
|                                                         |                  |           | Wider family and friends | 2.620 | 0.320  |  |
|                                                         |                  |           | Colleagues at work       | 2.075 | 0.304  |  |
|                                                         |                  |           | Society in general       | 1.620 | 0.244  |  |
| Perceived behavioural control                           | 0.375            | 1.38E-100 | Close family             | 1.233 | 0.355  |  |
|                                                         |                  |           | Wider family and friends | 1.431 | 0.368  |  |
|                                                         |                  |           | Colleagues at work       | 1.486 | 0.339  |  |
|                                                         |                  |           | Society in general       | 1.471 | 0.343  |  |
| Tips for mental health (calculated quality)             |                  | R squared | GoF                      |       |        |  |
|                                                         |                  | 0.971     | 0.878                    |       |        |  |
| Inner model                                             |                  |           | Outer model              |       |        |  |
| Construct                                               | Path coefficient | p-value   | Indicator                | VIF   | Weight |  |
| Attitude                                                | 0.469            | 1.35E-203 | Close family             | 4.738 | 0.277  |  |
|                                                         |                  |           | Wider family and friends | 5.816 | 0.282  |  |
|                                                         |                  |           | Colleagues at work       | 3.649 | 0.266  |  |
|                                                         |                  |           | Society in general       | 3.120 | 0.262  |  |
| Subjective norm                                         | 0.249            | 3.79E-87  | Close family             | 3.959 | 0.297  |  |
|                                                         |                  |           | Wider family and friends | 4.904 | 0.302  |  |
|                                                         |                  |           | Colleagues at work       | 2.789 | 0.268  |  |
|                                                         |                  |           | Society in general       | 2.228 | 0.255  |  |
| Perceived behavioural control                           | 0.410            | 3.16E-217 | Close family             | 2.238 | 0.308  |  |
|                                                         |                  |           | Wider family and friends | 2.957 | 0.299  |  |
|                                                         |                  |           | Colleagues at work       | 2.435 | 0.274  |  |
|                                                         |                  |           | Society in general       | 2.409 | 0.284  |  |
